1 **Endogenous viral elements are widespread in arthropod genomes and commonly give rise**  
2 **to piRNAs**

3

4 Anneliek M. ter Horst\*, Jared C. Nigg\*†, and Bryce W. Falk

5 \* These authors contributed equally to this work

6 † Corresponding author

7

8 *Department of Plant Pathology, University of California Davis, 1 Shields Avenue, Davis, CA*

9 *95616*

10

11 amterhorst@ucdavis.edu

12 jcnigg@ucdavis.edu

13 bwfalk@ucdavis.edu

14

15 **ABSTRACT**

16 Arthropod genomes contain sequences derived from integrations of DNA and non-  
17 retroviral RNA viruses. These sequences, known as endogenous viral elements (EVEs), have  
18 been acquired over the course of evolution and have been proposed to serve as a record of past  
19 viral infection. Recent evidence indicates that EVEs can function as templates for the biogenesis  
20 of PIWI-interacting RNAs (piRNAs) in some mosquito species and cell lines, raising the  
21 possibility that EVEs may function as a source of immunological memory in these organisms.  
22 However, whether EVEs are capable of acting as templates for piRNA production in other  
23 arthropod species is unknown. Here we used publically available genome assemblies and small

24 RNA sequencing datasets to characterize the repertoire and function of EVEs across 48  
25 arthropod genomes. We found that EVEs are widespread in arthropod genomes and primarily  
26 correspond to unclassified ssRNA viruses and viruses belonging to the Rhabdoviridae and  
27 Parvoviridae families. Additionally, EVEs were enriched in piRNA clusters in a majority of  
28 species and we found that production of primary piRNAs from EVEs is common, particularly for  
29 EVEs located within piRNA clusters. While we found evidence suggesting that piRNAs  
30 mapping to a number of EVEs are produced via the ping-pong cycle, potentially pointing  
31 towards a role for EVE-derived piRNAs during viral infection, limited nucleotide identity  
32 between currently described viruses and EVEs identified here likely limits the extent to which  
33 this process plays a role during infection with known viruses.

#### 34 **Keywords**

35 Endogenous viral element, piRNA, arthropod, small RNA, integrated viral sequences  
36

#### 37 **BACKGROUND**

38 Arthropods play key roles in terrestrial and aquatic ecosystems by pollinating plants,  
39 aiding in plant seed dispersal, controlling populations of other organisms, functioning as food  
40 sources for other organisms, and cycling nutrients [1, 2]. Besides their important contributions to  
41 maintaining ecosystem stability, some arthropods are also known to serve as vectors for human,  
42 animal, and plant pathogens [3, 4]. During arthropod-mediated transmission of many plant- and  
43 animal-infecting viruses, the virus replicates inside the arthropod vector, thus the vector serves as  
44 one of at least two possible hosts for these viruses [3, 4]. Additionally, arthropods are subject to  
45 infection by arthropod specific viruses that are not transmitted to new hosts [5]. Elucidating the  
46 antiviral mechanisms arthropods use to combat viral infection is an important area of research, as

47 a greater understanding of arthropod immunity may lead to new strategies for the control of  
48 arthropod-transmitted viruses.

49 RNA interference (RNAi) is the primary antiviral mechanism in arthropods and relies on  
50 three classes of small RNAs (sRNAs) [6, 7]. The small interfering RNA (siRNA) pathway is the  
51 most important branch of RNAi for combating viral infection in arthropods and this pathway  
52 relies on the production of primarily 21 nt siRNAs via cleavage of viral double-stranded RNA  
53 [7]. siRNAs associate with argonaute proteins to direct a multi-protein effector complex known  
54 as the RNA-induced silencing complex to the viral RNA, resulting in endonucleolytic cleavage  
55 of target RNA [7]. The micro RNA (miRNA) pathway relies primarily on inhibition of  
56 translation via imperfect base pairing between miRNAs and viral RNAs, but miRNAs can also  
57 direct cleavage of target RNA if there is sufficient complementarity between the miRNA and the  
58 target RNA [7]. A third branch of RNAi directed by PIWI-interacting RNAs (piRNAs) was  
59 discovered more recently and has been implicated as a component of antiviral defense in  
60 mosquitoes, but not in *Drosophila melanogaster* [8, 9].

61 The primary role of the piRNA pathway is control of transposable elements in animal  
62 germ cells and studies in *D. melanogaster* have revealed two models for piRNA biogenesis: the  
63 primary pathway and the ping-pong cycle (secondary pathway) [10]. In the primary pathway, 24-  
64 32 nt primary piRNAs with a strong bias for uracil as the 5'-most nucleotide (1U bias) are  
65 produced from endogenous transcripts derived from regions of the genome denoted as piRNA  
66 clusters. piRNA clusters contain a high load of sequences derived from transposable elements  
67 and generally primary piRNAs are antisense to RNAs produced by corresponding transposable  
68 elements [11]. During the ping-pong cycle in *D. melanogaster*, antisense primary piRNAs guide  
69 the PIWI family argonaute protein Piwi to transposable element RNA, resulting in

70 endonucleolytic cleavage of transposable element RNA exactly 10 nt downstream from the 5'  
71 end of the guiding primary piRNA [10]. Cleaved transposable element RNA is subsequently  
72 processed into sense secondary piRNAs with a bias for adenine as the 10th nucleotide from the 5'  
73 end (10A bias). Secondary piRNAs are then loaded onto Aubergine, another PIWI family  
74 argonaute protein, and direct cleavage of endogenous transcripts derived from piRNA clusters,  
75 resulting in the production of additional primary piRNAs [10]. Thus, the ping-pong cycle serves  
76 to amplify the post-transcriptional silencing activity of the piRNA pathway in response to active  
77 transposable elements. Interestingly, the PIWI family has undergone expansion in mosquitoes  
78 and it is now clear that the mechanisms responsible for generating virus-derived piRNAs in these  
79 organisms are distinct from the canonical piRNA pathway used to combat transposable element  
80 activity [12, 13]. Key to the novel piRNA pathway seen in mosquitoes is the biogenesis of  
81 primary piRNAs directly from exogenous viral RNA without the need for primary piRNAs  
82 derived from endogenous sequences [13].

83       Recent studies have revealed that the genomes of some eukaryotic species contain  
84 sequences derived from integrations of DNA and non-retroviral RNA viruses [14-18]. These  
85 sequences are known as endogenous viral elements (EVEs) and are proposed to serve as a partial  
86 record of past viral infections [15]. Moreover, a number of studies have demonstrated that EVEs  
87 are present within piRNA clusters and serve as sources of piRNAs in certain mosquito species  
88 and cell lines, raising the possibility that EVEs may participate in an antiviral response against  
89 exogenous viruses via the canonical piRNA pathway [14, 15, 18]. While EVEs have been  
90 reported in a number of other arthropod species, their potential involvement with the piRNA  
91 pathway remains unclear. Here we sought to expand knowledge of EVEs and their role in the  
92 piRNA pathway beyond mosquito species. To this end we performed a comprehensive analysis

93 to characterize the abundance, diversity, distribution, and function of EVEs across all arthropod  
94 species with sequenced genomes for which there are corresponding publically available sRNA  
95 sequencing data. Our results reveal that, as has been observed in mosquitoes, EVEs are abundant  
96 in arthropod genomes and many EVEs produce primary piRNAs. Additionally, we found  
97 evidence suggesting that piRNAs mapping to a number of EVEs are produced via the ping-pong  
98 cycle, potentially pointing towards a role for EVE-derived piRNAs during viral infection.  
99 However, limited nucleotide identity between currently described viruses and EVEs identified  
100 here likely limits the extent to which this process plays a role during infection with known  
101 viruses.

102

## 103 **MATERIALS AND METHODS**

### 104 **Data Collection**

105 A list of currently sequenced arthropod genomes was retrieved from the 5,000 insect  
106 genome project [19]. Genome sequences were then retrieved from GenBank for all species with  
107 sRNA sequencing data available in the NCBI sequence read archive (SRA). The accession  
108 numbers for all genome assemblies analyzed are available in additional file 1. For each arthropod  
109 species, a representative collection of available sRNA datasets was retrieved from the NCBI  
110 SRA and the datasets were combined for analysis. The accession numbers of sRNA datasets used  
111 for each species are available in additional file 2.

112

### 113 **Identification of EVEs**

114 To identify EVEs in arthropod genomes, we created a BLAST database containing all  
115 ssRNA, dsRNA, and ssDNA virus protein sequences available in GenBank. We did not include

116 dsDNA viruses in our analysis due to the difficulty in unambiguously characterizing dsDNA-  
117 viral sequences to be of viral origin due to the frequency of horizontal gene transfer between  
118 dsDNA viruses and their hosts, and between dsDNA viruses and transposable elements. For each  
119 arthropod species, we searched for matches to our viral protein database genome wide using  
120 BLASTx with an evaluate of 0.001. As reported previously, we found that a large number of  
121 putative EVEs identified by this process could not be unambiguously classified as viral  
122 sequences due to homology with eukaryotic, bacterial, or archaeal sequences [15]. Such artifacts  
123 were initially filtered out of the dataset using custom scripts to extract the genomic nucleotide  
124 sequence corresponding to each BLASTx hit (i.e. putative EVEs) and then performing a reverse  
125 BLASTx search with these nucleotide sequences against the *D. melanogaster* proteome (Uniprot  
126 proteome ID UP000000803) with an evaluate of 0.001. Any putative EVEs with a BLASTx hit  
127 against the *D. melanogaster* proteome were subsequently removed from analysis. Following this  
128 initial filter, the viral proteins corresponding to each putative EVE were compared to the non-  
129 redundant protein database by BLASTp and the results were screened manually. If the putative  
130 EVE corresponded to a portion of the viral protein possessing a non-viral BLAST hit or a  
131 conserved domain with a non-viral lineage (ex. zinc finger domains) then it was removed from  
132 the dataset.

133 Custom python scripts were used to remove duplicate and overlapping EVEs. When two  
134 EVEs overlapped, the EVE with the higher BLASTx score was retained. An EVE was defined as  
135 one continuous BLASTx hit. Custom python scripts were then used to assign a viral family to  
136 each EVE.

137

138 **Identification of EVEs in piRNA clusters**

139 Adapter sequences were removed from the sRNA datasets with Cutadapt (version 1.16)  
140 using the default settings with the exception that reads as short as 18 nt were retained [20]. After  
141 trimming, all the sRNA datasets for each species were concatenated into one dataset per species.  
142 These concatenated sRNA datasets were used for all further analysis. piRNA clusters were  
143 defined with proTRAC (v2.3.1) using the default settings with the following exceptions: sliding  
144 window size = 1000, sliding window increment = 500, threshold clustersize = 1500, and  
145 threshold-density p-value = 0.1 [21]. We identified EVEs within piRNA cluster sequences  
146 obtained with proTRAC as described above for identification of EVEs genome wide. Custom  
147 python scripts were then used to remove any EVEs from the genome wide EVE list that were  
148 present in the piRNA cluster EVE list. If an EVE was partially inside and partially outside a  
149 piRNA cluster, it was marked as residing outside the piRNA cluster.

150

### 151 **Small RNA mapping and piRNA identification**

152 Concatenated sRNA reads were mapped to arthropod genomes with bowtie (version  
153 1.1.2), using the default settings [22]. Individual BAM files corresponding to each EVE were  
154 then generated using samtools based on the genomic coordinates of each EVE and sRNAs  
155 mapping to each EVE were extracted from these BAM files using bedtools [23, 24]. Custom  
156 python scripts were used to calculate whether an EVE served as a source of primary piRNAs.  
157 This was defined as a significant 1U bias ( $p < .001$ , cumulative binomial distribution) for 24-32  
158 nt sRNAs mapping to one strand of the EVE. Unlike some other previously described  
159 approaches, our analysis examined 1U biases on either strand individually and did not require  
160 primary piRNAs to be derived from the antisense strand with respect to the coding potential of  
161 the EVEs.

162 To determine whether sRNAs mapping to each EVE possessed a significant ping-pong  
163 signature we first used custom python scripts to calculate whether 24-32 nt sRNAs mapping to  
164 each EVE possessed a significant 1U bias as described above. If a 1U bias was observed for  
165 sRNAs mapping to one strand, we determined whether 24-32 nt sRNAs mapping to the opposite  
166 strand possessed a significant 10A bias ( $p < .001$ , cumulative binomial distribution). We then  
167 used signature.py to calculate a ping-pong Z-score for 24-32 nt sRNAs mapping to each EVE  
168 [25]. sRNAs mapping to each EVE were classified as possessing a significant ping-pong  
169 signature if we observed significant 1U and 10A biases for 24-32 nt sRNAs mapping to opposing  
170 strands and if the ping-pong Z-score was  $\geq 3.2905$  (which corresponds to p-value of 0.001 for a  
171 two-tailed hypothesis).

172

### 173 **Calculation of nucleotide identities**

174 For each EVE sharing  $\geq 75\%$  deduced amino acid identity with its closest viral hit by  
175 BLASTx, we retrieved the nucleotide sequence of the EVE using the genomic coordinates. Each  
176 EVE nucleotide sequence was then compared to the NCBI non-redundant nucleotide collection  
177 via BLASTn. The nucleotide identity obtained via BLASTn was reported. The viral sequences  
178 identified by BLASTn were not always the same sequences initially identified by BLASTx (ex.  
179 BLASTn identified a strain represented in the non-redundant nucleotide collection, but not  
180 represented in the non-redundant protein database). Thus, for calculation of deduced amino acid  
181 identities between EVEs and the viral sequences identified by BLASTn, the nucleotide  
182 sequences present in the BLASTn alignments were translated and compared via BLASTx

183

## 184 **RESULTS**



185 **EVEs are commonly found within arthropod genomes**

186 We began by identifying all arthropod species for which there are both publically  
187 available genome assemblies and sRNA sequencing datasets. We then created a custom database  
188 comprised of all ssDNA, ssRNA, and dsRNA viral protein sequences available in GenBank and  
189 used this database to identify putative EVEs genome wide in each arthropod genome via  
190 BLASTx. As reported previously, we found that a large number of putative EVEs could not be  
191 unambiguously classified as viral due to homology with eukaryotic, bacterial, or archaeal  
192 sequences [15]. We removed the majority of putative EVEs homologous to eukaryotic sequences  
193 via reverse BLAST searches against the *D. melanogaster* proteome. The remaining putative  
194 EVEs were then filtered manually. Ultimately, we identified 4,061 EVEs within the genomes of  
195 48 arthropod species (Table 1 & Additional files 3-4). With the exception of *Sarcoptes scabiei*,  
196 we found at least one EVE in each arthropod genome.

197 The 48 arthropod genomes analyzed here contained a median of 1.28 EVEs/10<sup>7</sup> bp.  
198 Notable exceptions include *Apis mellifera* and *Musca domestica*, the genomes of which  
199 contained 4.36 EVEs/10<sup>9</sup> bp and 9.33 EVEs/10<sup>9</sup> bp, respectively. Interestingly, the ten  
200 *Drosophila* sp. genomes analyzed also contained a relatively low number of EVEs with a median  
201 of 4.19 EVEs/10<sup>8</sup> bp. With 5.68 EVEs/10<sup>7</sup> bp, the *Triops cancriformis* genome contained the  
202 largest number of EVEs relative to the size of the genome (Table 1).

203

204 **EVEs are enriched in piRNA clusters in a majority of species**

205 Previous studies have pointed towards a potential role for EVE-derived piRNAs in  
206 antiviral responses, and EVEs are enriched in piRNA clusters in *Aedes albopictus* and *Aedes*  
207 *aegypti* [14, 25]. Thus, we used publically available sRNA datasets to define piRNA clusters in

208 the arthropod genomes using proTRAC [21]. To increase the coverage and diversity of sRNAs  
209 used for this analysis, we combined representative collections of the available sRNA datasets for  
210 each species (Additional file 2). We then classified the EVEs into EVEs within piRNA clusters  
211 and EVEs outside piRNA clusters (Table 1 & Additional files 3-4). We found that 30 out of 48  
212 arthropod genomes contained EVEs within piRNA clusters and that EVEs were enriched in  
213 piRNA clusters in 28 of these species (Table 1). The median deduced amino acid identity shared  
214 between EVEs and their closest BLASTx hit was 34.0% for EVEs in piRNA clusters and 34.3%  
215 for EVEs outside piRNA clusters. We found that deduced amino acid identity was significantly  
216 higher for piRNA cluster resident EVEs in four species and significantly lower in three species  
217 (Fig. 1a). Interestingly, we found that when all species are considered, EVEs in piRNA clusters  
218 are significantly longer than EVEs outside piRNA clusters ( $p = .000101$ , two-tailed T-test). On  
219 an individual species level, EVEs were significantly longer within piRNA clusters in seven  
220 species and significantly lower in one species (Fig. 1b).

221

222 **EVEs corresponding to unclassified viruses and viruses belonging to the *Rhabdoviridae* and**  
223 ***Parvoviridae* families predominate both within and outside piRNA clusters**

224 Genome wide, we identified EVEs corresponding to viruses belonging to 54 different  
225 viral families (Additional files 5-6). Both within and outside piRNA clusters, unclassified viruses  
226 and viruses belonging to the *Rhabdoviridae* and *Parvoviridae* families comprised over 70% of  
227 all EVEs (Fig. 2). Interestingly a plurality of EVEs corresponded to viruses possessing negative  
228 sense ssRNA genomes (data not shown).

229 Whitfield et al. reported the presence of EVEs corresponding to viruses belonging to the  
230 *Closteroviridae* and *Bromoviridae* families within the genome of *A. aegypti*-derived Aag2 cells

231 [15]. This is somewhat unexpected, as these families are comprised solely of viruses that do not  
232 infect *A. aegypti*, but only infect plants. These viruses are transmitted by their respective insect  
233 vectors in a non-circulative manner [3]. In agreement with these findings, we also identified a  
234 number of EVEs corresponding to viruses of the *Closteroviridae* and *Bromoviridae* families, as  
235 well as several other families comprised of viruses not known to replicate outside their plant  
236 hosts including *Geminiviridae*, *Nanoviridae*, *Luteoviridae*, *Potyviridae*, *Secoviridae*,  
237 *Tombusviridae*, and *Virgaviridae* (Additional files 5-6).

238

239 **Primary piRNA production from EVEs is widespread, but nucleotide identity between**  
240 **EVEs and known viruses is low**

241 Previous studies have revealed that EVEs serve as a templates for piRNA production in  
242 *A. aegypti*, *A. albopictus*, and *Culex quinquefasciatus* [14, 15, 26], however, it is unclear whether  
243 piRNAs are produced from EVEs in non-mosquito arthropod species. We examined the sRNAs  
244 mapping to each EVE for the characteristics of primary piRNAs (i.e. 1U bias for sRNAs 24-32 nt  
245 in length). Some previous studies have assessed primary piRNA production from EVEs by  
246 measuring 1U biases only for sRNAs mapping antisense with respect to the coding region of the  
247 EVE (based on comparison to the corresponding virus). However, primary piRNAs could  
248 theoretically be produced from precursor transcripts derived from either genomic strand. Thus,  
249 we evaluated 1U biases for 24-32 nt sRNAs mapping either sense or antisense to each EVE.  
250 Biases were calculated using a cumulative binomial distribution and deemed significant when  $p$   
251  $< 0.001$ . We found that the vast majority (81.4%) of EVEs within piRNA clusters served as  
252 sources of primary piRNAs. Outside of piRNA clusters, only 35.7% of EVEs served as sources  
253 of primary piRNAs. These results indicate that, as in *A. albopictus*, *A. aegypti*, and *C.*

254 *quinquefasciatus*, primary piRNAs are frequently derived from EVEs. piRNA production from  
255 EVEs was particularly common in *A. aegypti*, *A. albopictus*, *Acyrtosiphon pisum*, *Anopheles*  
256 *stephensi*, *Bactrocera dorsalis*, and *Nicrophorus vespilloides*, with over 75% of EVEs genome  
257 wide serving as templates for primary piRNA biogenesis in these species (Fig. 3). piRNAs were  
258 not detected from EVEs in 14 species. Of these, 11 species did not possess EVEs within piRNA  
259 clusters.

260         Given what is known regarding the effects of sequence identity on piRNA-directed  
261 cleavage, targeting of exogenous viruses by EVE-derived piRNAs likely requires extensive  
262 complementarity between EVEs and corresponding viruses [27, 28]. To elucidate the targeting  
263 potential of EVEs identified here, we extracted nucleotide sequences for all EVEs with  $\geq 75\%$   
264 deduced amino acid identity with their closest viral hit via BLASTx. We then used BLASTn to  
265 calculate the nucleotide identities between these EVEs and corresponding viruses. We found  
266 only 13 EVE-virus pairs with nucleotide identity  $\geq 90\%$ , and only 17 pairs with at least one  $\geq 20$   
267 nt region of perfect identity (Table 2). These results indicate that, with the exception of a small  
268 number of EVE-virus pairs, nucleotide identity between EVEs and known viruses is likely too  
269 low to permit targeting of known viruses by EVE-derived piRNAs in the species analyzed here.  
270

### 271 **sRNAs mapping to some EVEs show evidence of production via the ping-pong cycle**

272         While we found that nucleotide identity between EVEs and known viruses is generally  
273 low, which likely precludes induction of the ping-pong cycle by EVE-derived piRNAs upon  
274 infection with known viruses, currently described virus species are thought to represent only a  
275 small fraction of total viral diversity, particularly for arthropod-infecting viruses [29]. Thus,  
276 there is a possibility that EVE-derived piRNAs could target undescribed viruses and the presence

277 of ping-pong signatures in piRNAs mapping to EVEs would be one indication of the possible  
278 functionality of EVE-derived piRNAs. After defining EVEs that produced primary piRNAs (Fig.  
279 3), we assessed whether 24-32 nt sRNAs mapping to these EVEs possessed significant ping-  
280 pong signatures. We defined a significant ping-pong signature as 1U and 10A biases for 24-32 nt  
281 sRNAs mapping to opposing strands and a ping-pong Z-score of  $\geq 3.2905$ . We found that  
282 sRNAs mapping to 3.4% of all EVEs displayed evidence of production via the ping-pong cycle  
283 with 20 species possessing at least one EVE displaying evidence of ping-pong dependant piRNA  
284 production (Table 3). This number was slightly higher for EVEs within piRNA clusters (5.37%)  
285 than for EVEs outside piRNA clusters (3.05%). While further experiments are necessary, we  
286 propose that one explanation for the observed ping-pong signatures could be infection with  
287 undescribed viruses corresponding to primary piRNA-producing EVEs.

288

## 289 **DISCUSSION**

290 Mounting evidence points towards a role for EVEs in antiviral responses against  
291 corresponding viruses in animals and both transcription and translation of EVEs have been  
292 hypothesized to play important roles. Indeed, some EVEs possess features of purifying selection  
293 including maintenance of long open reading frames and low ratios of non-  
294 synonymous:synonymous mutations [30]. Moreover, experimental evidence indicating the  
295 functionality of EVE-encoded proteins has been shown in the thirteen-lined ground squirrel, the  
296 genome of which possess an EVE-encoded protein that inhibits replication of the corresponding  
297 virus *in vitro* [31]. Proposed mechanisms of transcription-mediated EVE-based immunity  
298 include the production of primary piRNAs from EVE-derived transcripts as well as the  
299 formation of dsRNA due to bi-directional transcription of EVEs and/or extensive secondary

300 structure in EVE-derived transcripts [32].

301 Previous research indicates that EVEs are widespread in mosquito genomes and  
302 commonly produce piRNAs [14, 15, 18]. However, relatively little is known regarding the  
303 presence and functionality of EVEs in other arthropod species. Here we examined 48 arthropod  
304 genomes representing species belonging to 16 orders. We found that, as has been demonstrated  
305 in mosquitoes, EVEs are pervasive in the genomes of species spread throughout the arthropod  
306 lineage and frequently serve as templates for the biogenesis of piRNAs. Interestingly, we found  
307 that EVEs corresponding to negative sense ssRNA viruses comprised a plurality of the EVEs  
308 identified here. We also identified a large number of EVEs corresponding to viruses of the  
309 family *Parvoviridae*. As reported previously for *A. aegypti* and *A. albopictus*, we found that  
310 EVEs were enriched in piRNA clusters in a majority of species analyzed.

311 It has been proposed that EVE-derived piRNAs may play an antiviral role via the ping-  
312 pong cycle by directing post-transcriptional silencing of viral RNAs [15]. Cleavage of RNA  
313 targets by primary piRNA-guided argonaute proteins is dependent on base-pairing between  
314 primary-piRNAs and RNA targets [27]. However, unlike siRNA-directed cleavage, piRNA-  
315 directed cleavage appears to tolerate a small number of mismatches ( $\sim < 2-3$ ) such that  
316 extensive, but not perfect, complementarity between piRNAs and their targets is required [27,  
317 28]. While nucleotide identity between the majority of EVEs identified here and known viruses  
318 is generally too low to permit targeting of known viruses by EVE-derived piRNAs, 24-32 nt  
319 sRNAs mapping to 3.4% of EVEs possessed significant ping-pong signatures. These results raise  
320 the possibility that piRNAs derived from these EVEs may play roles in responses to infection  
321 with corresponding undescribed viruses.

322 We encountered a number of technical difficulties in our analysis. For some species,

323 available genome assemblies and sRNA datasets were derived from different strains of the  
324 organism and in a small number of cases sRNA datasets derived only from one sex, only from  
325 particular organs, or only from certain life stages were available. These situations led to lower  
326 genome coverage of some species by mapped sRNAs, likely resulting in an underestimation of  
327 the number of EVEs producing primary piRNAs as well as the proportion of the genome  
328 annotated as piRNA clusters. Additionally, we found that when compared to experimental  
329 definitions of piRNA clusters, the piRNA clusters defined by proTRAC comprised smaller  
330 proportions of the genome. This may be due, in part, to the fact that the proTRAC algorithm was  
331 designed based on the characteristics of mammalian piRNA clusters, which display some  
332 important differences compared to arthropod piRNA clusters [10, 21]. Finally, the quality of  
333 genome assemblies in our analysis varied greatly. While the genome assemblies for some species  
334 such as *D. melanogaster* and *A. aegypti* are complete and well assembled, many genome  
335 assemblies are incomplete, highly fragmented, and contain duplications, particularly in repetitive  
336 regions such as piRNA clusters that typically contain a higher load of EVEs. Thus, we believe  
337 that as these genome assemblies improve, so too will our ability to accurately catalog the  
338 collection of EVEs present within them.

339

## 340 **CONCLUSIONS**

341 An understanding of arthropod antiviral immunity is critical for the development of novel  
342 strategies to control vector-mediated virus transmission to animal and plant hosts. Our findings  
343 reveal that the important observations regarding the functionality of EVEs in mosquitoes apply  
344 to a wide range of other arthropod species and lend further support to the hypothesis that, in  
345 some circumstances, EVEs may constitute a form of heritable immunity against corresponding

346 viruses. While EVEs may indeed occasionally provide the basis for an immunological response,  
347 we propose that given the lack of extensive nucleotide identity observed between EVEs  
348 identified here and currently described exogenous viruses, endogenization of viral sequences is  
349 an infrequent event and the ability of EVE-derived piRNAs to initiate a response against virus  
350 infection may decline over evolutionary time as exogenous viruses and their corresponding  
351 EVEs diverge. To gain an understanding of the general utility of the interaction between EVEs  
352 and the piRNA pathway as an antiviral mechanism, future studies should address the timescale  
353 over which acquisition of new EVEs takes places and to what extent genomic EVE content  
354 varies between geographically distinct populations of a given species.

355

## 356 **DECLARATIONS**

### 357 **Authors' contributions**

358 AMH wrote the scripts and performed the analyses. JCN conceived the study, wrote the scripts,  
359 and performed the analyses. All authors analyzed the data, wrote the manuscript, and approved  
360 the final manuscript.

361

### 362 **Funding**

363 This material is based upon work supported by the National Science Foundation Graduate  
364 Research Fellowship Program under Grant No. 1650042, and grants from the U. S. Department  
365 of Agriculture (grants 13-002NU-781; 2015-70016-23011) and the University of California.

366

### 367 **Availability of data and material**

368 The datasets and scripts used and/or analyzed during the current study are available from the



369 corresponding author on reasonable request.

370

### 371 **Competing interests**

372 The authors declare that they have no competing interests

373

### 374 **Ethics approval and consent to participate**

375 Not applicable

376

### 377 **Consent for publication**

378 Not applicable

379

### 380 **Acknowledgements**

381 No Applicable

382

### 383 **REFERENCES**

384 1. Joern A, Laws AN. Ecological mechanisms underlying arthropod species diversity in  
385 grasslands. *Annu Rev Entomol.* 2013;58:19-36.

386 2. Momot WT. Redefining the role of crayfish in aquatic ecosystems. *Rev Fish Sci.* 1995;  
387 3(1):33-63.

388 3. Whitfield AE, Falk BW, Rotenberg D. Insect vector-mediated transmission of plant  
389 viruses. *Virology.* 2015;479:278-289.

390 4. Gray SM, Banerjee N. Mechanisms of arthropod transmission of plant and animal  
391 viruses. *Microbiol Mol Biol Rev.* 1999;63(1):128-148.

- 392 5. Calisher CH, Higgs S. The discovery of arthropod-specific viruses in hematophagous  
393 arthropods: an open door to understanding the mechanisms of arbovirus and arthropod  
394 evolution? *Annu Rev Entomol.* 2018; 63:87-103.
- 395 6. Palmer WH, Varghese FS, Van Rij RP. Natural variation in resistance to virus infection  
396 in dipteran insects. *Viruses.* 2018;10(3):118.
- 397 7. Obbard DJ, Gordon KH, Buck AH, Jiggins FM. The evolution of RNAi as a defence  
398 against viruses and transposable elements. *Philos Trans R Soc Lond B Biol Sci.* 2009;  
399 364(1513):99-115.
- 400 8. Miesen P, Joosten J, van Rij RP. PIWIs go viral: arbovirus-derived piRNAs in vector  
401 mosquitoes. *PLoS Pathog.* 2016;12(12):e1006017.
- 402 9. Petit M, Mongelli V, Frangeul L, Blanc H, Jiggins F, Saleh M-C. piRNA pathway is not  
403 required for antiviral defense in *Drosophila melanogaster*. *Proc Natl Acad Sci U S A.*  
404 2016; 113(29):E4218-E4227.
- 405 10. Czech B, Hannon GJ. One loop to rule them all: the ping-pong cycle and piRNA-guided  
406 silencing. *Trends Biochem Sci.* 2016;41(4):324-337.
- 407 11. Brennecke J, Aravin AA, Stark A, Dus M, Kellis M, Sachidanandam R, et al. Discrete  
408 small RNA-generating loci as master regulators of transposon activity in *Drosophila*.  
409 *Cell.* 2007;128(6):1089-1103.
- 410 12. Campbell CL, Black WC, Hess AM, Foy BD. Comparative genomics of small RNA  
411 regulatory pathway components in vector mosquitoes. *BMC Genomics.* 2008;9(1):425.
- 412 13. Miesen P, Girardi E, van Rij RP. Distinct sets of PIWI proteins produce arbovirus and  
413 transposon-derived piRNAs in *Aedes aegypti* mosquito cells. *Nucleic Acids Res.*  
414 2015;43(13):6545-6556.

- 415 14. Palatini U, Miesen P, Carballar-Lejarazu R, Ometto L, Rizzo E, Tu Z, et al. Comparative  
416 genomics shows that viral integrations are abundant and express piRNAs in the arboviral  
417 vectors *Aedes aegypti* and *Aedes albopictus*. BMC Genomics. 2017;8(1):512.
- 418 15. Whitfield ZJ, Dolan PT, Kunitomi M, Tassetto M, Seetin MG, Oh S, et al. The diversity,  
419 structure, and function of heritable adaptive immunity sequences in the *Aedes aegypti*  
420 genome. Curr Biol. 2017;27(22):3511-3519.
- 421 16. Katzourakis A, Gifford RJ. Endogenous viral elements in animal genomes. PLoS Genet.  
422 2010;6(11):e1001191.
- 423 17. François S, Filloux D, Roumagnac P, Bigot D, Gayral P, Martin DP, et al. Discovery of  
424 parvovirus-related sequences in an unexpected broad range of animals. Sci Rep.  
425 2016;6:30880.
- 426 18. Suzuki Y, Frangeul L, Dickson LB, Blanc H, Verdier Y, Vinh J, et al. Uncovering the  
427 repertoire of endogenous flaviviral elements in *Aedes* mosquito genomes. J Virol.  
428 2017;91(15):e00571-17.
- 429 19. Consortium iK. The i5K initiative: advancing arthropod genomics for knowledge, human  
430 health, agriculture, and the environment. J Hered. 2013;104(5):595-600.
- 431 20. Martin M. Cutadapt removes adapter sequences from high-throughput sequencing reads.  
432 EMBnet J. 2011;17(1):10-12.
- 433 21. Rosenkranz D, Zischler H. proTRAC-a software for probabilistic piRNA cluster  
434 detection, visualization and analysis. BMC Bioinformatics. 2012;13(1):5.
- 435 22. Langmead B, Trapnell C, Pop M, Salzberg SL. Ultrafast and memory-efficient alignment  
436 of short DNA sequences to the human genome. Genome Biol. 2009;10(3):R25.
- 437 23. Li H, Handsaker B, Wysoker A, Fennell T, Ruan J, Homer N, et al. The sequence

- 438 alignment/map format and SAMtools. *Bioinformatics*. 2009;25(16):2078-2079.
- 439 24. Quinlan AR, Hall IM. BEDTools: a flexible suite of utilities for comparing genomic  
440 features. *Bioinformatics*. 2010;26(6):841-842.
- 441 25. Antoniewski C. Computing siRNA and piRNA overlap signatures. In: Werner A, editor.  
442 Animal endo-siRNAs: methods and protocols. New York: Humana Press; 2014. p. 135-  
443 146.
- 444 26. Lourenço-de-Oliveira R, Marques JT, Sreenu VB, Nten CA, Aguiar ERGR, et al. *Culex*  
445 *quinquefasciatus* mosquitoes do not support replication of Zika virus. *J Gen Virol*.  
446 2018;99(2):258-264.
- 447 27. Reuter M, Berninger P, Chuma S, Shah H, Hosokawa M, Funaya C, et al. Miwi catalysis  
448 is required for piRNA amplification-independent LINE1 transposon silencing. *Nature*.  
449 2011;480:264-267.
- 450 28. Huang XA, Yin H, Sweeney S, Raha D, Snyder M, Lin H. A major epigenetic  
451 programming mechanism guided by piRNAs. *Dev Cell*. 2013;24(5):502-516.
- 452 29. Shi M, Lin X-D, Tian J-H, Chen L-J, Chen X, Li C-X, et al. Redefining the invertebrate  
453 RNA virosphere. *Nature*. 2016;540:539-543.
- 454 30. Aswad A, Katzourakis A. Paleovirology and virally derived immunity. *Trends Ecol Evol*.  
455 2012;27(11):627-636.
- 456 31. Fujino K, Horie M, Honda T, Merriman DK, & Tomonaga K. Inhibition of Borna disease  
457 virus replication by an endogenous bornavirus-like element in the ground squirrel  
458 genome. *Proc Natl Acad Sci U S A*. 2014;111(36):13175-13180.
- 459 32. Goic B, Vodovar N, Mondotte JA, Monot C, Frangeul L, Blanc H, et al. RNA-mediated  
460 interference and reverse transcription control the persistence of RNA viruses in the insect

461 model *Drosophila*. *Nat Immunol.* 2013;14(4):396.

462

463 **ADDITIONAL FILES**

464 Additional file 1: GenBank accession numbers of genome assemblies. (XLSX 10 kb)

465 Additional file 2: GenBank Accession numbers of sRNA datasets. (XLSX 16 kb)

466 Additional file 3: Endogenous viral elements found within piRNA clusters in 48 arthropod

467 genome assemblies via BLASTx. Species in which no Endogenous viral elements were

468 found within piRNA clusters are not included. Species are separated into one species per

469 sheet. (XLSX 103 kb)

470 Additional file 4: Endogenous viral elements found outside piRNA clusters in 48 arthropod

471 genome assemblies via BLASTx. Species are separated into one species per sheet.

472 (XLSX 409 kb)

473 Additional file 5: Viral families corresponding to endogenous viral elements found within

474 piRNA clusters. (XLSX 13 kb)

475 Additional file 6: Viral families corresponding to endogenous viral elements found outside

476 piRNA clusters. (XLSX 153 kb)

477

478

479

480

481

482

483

484 **TABLES**

485 **Table 1** Enrichment of EVEs in piRNA clusters

| Species                          | Genomic Region <sup>1</sup> | Length (bp)   | % of Genome | # EVEs | EVE Enrichment in piRNA Clusters |
|----------------------------------|-----------------------------|---------------|-------------|--------|----------------------------------|
| <i>Acyrtosiphon pisum</i>        | piRNA clusters              | 26,324,066    | 4.86%       | 127    | ***                              |
|                                  | Whole genome                | 541,716,367   | -           | 294    |                                  |
| <i>Aedes aegypti</i>             | piRNA clusters              | 43,772,915    | 3.16%       | 117    | ***                              |
|                                  | Whole genome                | 1,383,978,943 | -           | 273    |                                  |
| <i>Aedes albopictus</i>          | piRNA clusters              | 2,176,195     | 0.10%       | 3      | **                               |
|                                  | Whole genome                | 2,247,291,986 | -           | 502    |                                  |
| <i>Anopheles arabiensis</i>      | piRNA clusters              | 1,994,683     | 0.81%       | 6      | ***                              |
|                                  | Whole genome                | 246,569,081   | -           | 16     |                                  |
| <i>Anopheles gambiae</i>         | piRNA clusters              | 9,472,362     | 2.88%       | 7      | ***                              |
|                                  | Whole genome                | 329,012,562   | -           | 64     |                                  |
| <i>Anopheles stephensi</i>       | piRNA clusters              | 2,409,359     | 1.15%       | 5      | ***                              |
|                                  | Whole genome                | 209,515,279   | -           | 23     |                                  |
| <i>Apis mellifera</i>            | piRNA clusters              | 1,867,492     | 0.82%       | 0      | -                                |
|                                  | Whole genome                | 229,123,808   | -           | 1      |                                  |
| <i>Armadillidium vulgare</i>     | piRNA clusters              | 56,355        | 0.36%       | 0      | -                                |
|                                  | Whole genome                | 15,705,380    | -           | 4      |                                  |
| <i>Bactrocera dorsalis</i>       | piRNA clusters              | 1,692,853     | 0.41%       | 10     | ***                              |
|                                  | Whole genome                | 414,975,858   | -           | 19     |                                  |
| <i>Blattella germanica</i>       | piRNA clusters              | 71,312,292    | 4.17%       | 16     | ***                              |
|                                  | Whole genome                | 1,710,648,823 | -           | 66     |                                  |
| <i>Bombus terrestris</i>         | piRNA clusters              | 134,793       | 0.06%       | 0      | -                                |
|                                  | Whole genome                | 236,392,901   | -           | 51     |                                  |
| <i>Bombx mori</i>                | piRNA clusters              | 26,961,546    | 5.86%       | 26     | ***                              |
|                                  | Whole genome                | 460,334,713   | -           | 54     |                                  |
| <i>Camponotus floridanus</i>     | piRNA clusters              | 24,341        | 0.01%       | 0      | -                                |
|                                  | Whole genome                | 224,555,298   | -           | 121    |                                  |
| <i>Centruroides sculpturatus</i> | piRNA clusters              | 21,894,072    | 2.37%       | 0      | -                                |
|                                  | Whole genome                | 925,483,296   | -           | 13     |                                  |
| <i>Ceratosolen solmsi</i>        | piRNA clusters              | 1,904,847     | 0.69%       | 0      | -                                |
|                                  | Whole genome                | 277,061,652   | -           | 36     |                                  |
| <i>Dermatophagoides farinae</i>  | piRNA clusters              | 9,657         | 0.01%       | 0      | -                                |
|                                  | Whole genome                | 91,936,773    | -           | 18     |                                  |
| <i>Diaphorina citri</i>          | piRNA clusters              | 403,877       | 0.08%       | 18     | ***                              |
|                                  | Whole genome                | 485,867,070   | -           | 104    |                                  |
| <i>Drosophila erecta</i>         | piRNA clusters              | 227,344       | 0.16%       | 0      | -                                |
|                                  | Whole genome                | 145,091,640   | -           | 6      |                                  |
| <i>Drosophila melanogaster</i>   | piRNA clusters              | 489,366       | 0.34%       | 0      | -                                |
|                                  | Whole genome                | 143,727,872   | -           | 1      |                                  |
| <i>Drosophila mojavensis</i>     | piRNA clusters              | 6,971,121     | 3.60%       | 2      | ***                              |
|                                  | Whole genome                | 193,833,151   | -           | 5      |                                  |
| <i>Drosophila persimilis</i>     | piRNA clusters              | 1,924,687     | 1.02%       | 0      | -                                |
|                                  | Whole genome                | 188,386,917   | -           | 8      |                                  |
| <i>Drosophila pseudoobscura</i>  | piRNA clusters              | 160,414       | 0.09%       | 0      | -                                |
|                                  | Whole genome                | 171,319,450   | -           | 9      |                                  |
| <i>Drosophila sechellia</i>      | piRNA clusters              | 1,188,798     | 0.76%       | 0      | -                                |

|                                 |                |               |       |     |     |
|---------------------------------|----------------|---------------|-------|-----|-----|
|                                 | Whole genome   | 157,260,000   | -     | 20  |     |
| <i>Drosophila simulans</i>      | piRNA clusters | 934,967       | 0.75% | 0   |     |
|                                 | Whole genome   | 124,956,420   | -     | 2   | -   |
| <i>Drosophila virilis</i>       | piRNA clusters | 8,680,386     | 4.21% | 3   | *** |
|                                 | Whole genome   | 206,040,227   | -     | 8   |     |
| <i>Drosophila willistoni</i>    | piRNA clusters | 2,299,289     | 0.98% | 0   |     |
|                                 | Whole genome   | 235,531,186   | -     | 31  | -   |
| <i>Drosophila yakuba</i>        | piRNA clusters | 1,964,249     | 1.21% | 10  | *** |
|                                 | Whole genome   | 162,595,439   | -     | 33  |     |
| <i>Harpegnathos saltator</i>    | piRNA clusters | 653,301       | 0.23% | 5   | *** |
|                                 | Whole genome   | 283,034,581   | -     | 136 |     |
| <i>Heliconius melpomene</i>     | piRNA clusters | 2,357,019     | 0.86% | 0   |     |
|                                 | Whole genome   | 275,199,408   | -     | 67  | -   |
| <i>Helicoverpa armigera</i>     | piRNA clusters | 3,249,285     | 0.96% | 3   | *** |
|                                 | Whole genome   | 337,088,551   | -     | 20  |     |
| <i>Homalodisca vitripennis</i>  | piRNA clusters | 11,102,932    | 0.84% | 24  | *** |
|                                 | Whole genome   | 1,325,418,683 | -     | 355 |     |
| <i>Ixodes ricinus</i>           | piRNA clusters | 5,697,971     | 1.11% | 60  | *** |
|                                 | Whole genome   | 514,711,065   | -     | 168 |     |
| <i>Ixodes scapularis</i>        | piRNA clusters | 378,290       | 0.02% | 1   | **  |
|                                 | Whole genome   | 1,896,882,981 | -     | 387 |     |
| <i>limulus polyphemus</i>       | piRNA clusters | 17,684,516    | 0.97% | 15  | *** |
|                                 | Whole genome   | 1,828,558,544 | -     | 106 |     |
| <i>Lutzomyia longipalpis</i>    | piRNA clusters | 642,293       | 0.42% | 6   | *** |
|                                 | Whole genome   | 154,240,798   | -     | 41  |     |
| <i>Musca domestica</i>          | piRNA clusters | 19,474,903    | 2.60% | 4   | *** |
|                                 | Whole genome   | 750,424,431   | -     | 7   |     |
| <i>Myzus persicae</i>           | piRNA clusters | 14,408,803    | 4.15% | 16  | *** |
|                                 | Whole genome   | 347,317,491   | -     | 60  |     |
| <i>Neobellieria bullata</i>     | piRNA clusters | 524,246       | 0.13% | 5   | *** |
|                                 | Whole genome   | 396,408,944   | -     | 21  |     |
| <i>Nicrophorus vespilloides</i> | piRNA clusters | 3,966,609     | 2.03% | 1   | *** |
|                                 | Whole genome   | 195,278,032   | -     | 2   |     |
| <i>Oncopeltus fasciatus</i>     | piRNA clusters | 26,156,514    | 2.38% | 29  | *   |
|                                 | Whole genome   | 1,099,627,727 | -     | 80  |     |
| <i>Penaeus monodon</i>          | piRNA clusters | 14,301,335    | 0.99% | 0   |     |
|                                 | Whole genome   | 1,449,940,850 | -     | 248 | -   |
| <i>Plodia interpunctella</i>    | piRNA clusters | 5,441,074     | 1.49% | 2   | *   |
|                                 | Whole genome   | 364,638,958   | -     | 31  |     |
| <i>Plutella xylostella</i>      | piRNA clusters | 5,755,516     | 1.71% | 70  | *** |
|                                 | Whole genome   | 336,888,803   | -     | 171 |     |
| <i>Spodoptera frugiperda</i>    | piRNA clusters | 9,097,455     | 1.77% | 24  | *** |
|                                 | Whole genome   | 514,228,299   | -     | 241 |     |
| <i>Tetranychus urticae</i>      | piRNA clusters | 2,545,325     | 2.84% | 0   |     |
|                                 | Whole genome   | 89,602,137    | -     | 10  | -   |
| <i>Tribolium castaneum</i>      | piRNA clusters | 9,090,949     | 5.96% | 30  | *** |
|                                 | Whole genome   | 152,420,532   | -     | 54  |     |
| <i>Triops cancriformis</i>      | piRNA clusters | 4,016,357     | 3.68% | 7   | **  |
|                                 | Whole genome   | 109,242,312   | -     | 62  |     |
| <i>Varroa destructor</i>        | piRNA clusters | 35,171        | 0.01% | 0   |     |
|                                 | Whole genome   | 368,943,721   | -     | 12  | -   |

486 <sup>1</sup>The genome and piRNA cluster size (in base pairs of DNA [bp]) is shown.

487 \* =  $p < .05$ , \*\* =  $p < .01$ , \*\*\* =  $p < .001$ ; cumulative binomial distribution

488

489

490

491

492

493

494

495

496

497

498

499

500

501

502

503

504

505

506

507

508

509



510 **Table 2** Nucleotide identity between select EVEs and the closest known virus

| Arthropod Species            | Viral Species                            | Length (nt) | Identity (aa) | Identity (nt) | Longest Identical Regio |
|------------------------------|------------------------------------------|-------------|---------------|---------------|-------------------------|
| <i>Penaeus monodon</i>       | Penaeus stylirostris penstyldensovirus 2 | 73          | 100           | 100           | 73                      |
| <i>Penaeus monodon</i>       | IHHNV                                    | 67          | 100           | 100           | 67                      |
| <i>Penaeus monodon</i>       | IHHNV                                    | 48          | 100           | 100           | 48                      |
| <i>Penaeus monodon</i>       | IHHNV                                    | 95          | 100           | 100           | 95                      |
| <i>Penaeus monodon</i>       | IHHNV                                    | 239         | 100           | 100           | 239                     |
| <i>Penaeus monodon</i>       | Decapod penstyldensovirus 1              | 68          | 100           | 100           | 68                      |
| <i>Penaeus monodon</i>       | Penaeus stylirostris penstyldensovirus 2 | 212         | 100           | 99            | 187                     |
| <i>Penaeus monodon</i>       | IHHNV                                    | 380         | 99            | 99            | 177                     |
| <i>Penaeus monodon</i>       | Penaeus stylirostris densovirus          | 71          | 100           | 99            | 38                      |
| <i>Penaeus monodon</i>       | IHHNV                                    | 284         | 99            | 99            | 268                     |
| <i>Aedes aegypti</i>         | Cell fusing agent virus                  | 239         | 96            | 98            | 139                     |
| <i>Penaeus monodon</i>       | IHHNV                                    | 250         | 99            | 98            | 114                     |
| <i>Aedes aegypti</i>         | Cell fusing agent virus                  | 188         | 94            | 96            | 72                      |
| <i>Triops cancriformis</i>   | SACDV-21                                 | 63          | 76            | 89            | 22                      |
| <i>Diaphorina citri</i>      | Diaphorina citri densovirus              | 617         | 86            | 87            | 46                      |
| <i>Acyrtosiphon pisum</i>    | Dysaphis plantaginea densovirus          | 71          | 91            | 87            | 18                      |
| <i>Acyrtosiphon pisum</i>    | Dysaphis plantaginea densovirus          | 55          | 82            | 85            | 14                      |
| <i>Acyrtosiphon pisum</i>    | Dysaphis plantaginea densovirus          | 55          | 82            | 85            | 14                      |
| <i>Acyrtosiphon pisum</i>    | Dysaphis plantaginea densovirus          | 104         | 76            | 85            | 21                      |
| <i>Acyrtosiphon pisum</i>    | Myzus persicae nicotianae densovirus     | 165         | 83            | 84            | 17                      |
| <i>Aedes aegypti</i>         | Liao ning virus                          | 467         | 90            | 82            | 32                      |
| <i>Aedes aegypti</i>         | Grenada mosquito rhabdovirus 1           | 56          | 94            | 82            | 11                      |
| <i>Drosophila yakuba</i>     | Drosophila melanogaster sigma virus      | 110         | 83            | 81            | 16                      |
| <i>Aedes aegypti</i>         | North Creek virus                        | 47          | 80            | 79            | 14                      |
| <i>Drosophila yakuba</i>     | Drosophila melanogaster sigma virus      | 92          | 83            | 79            | 13                      |
| <i>Ixodes ricinus</i>        | Jingmen tick virus                       | 1125        | 84            | 77            | 20                      |
| <i>Spodoptera frugiperda</i> | Spodoptera frugiperda rhabdovirus        | 57          | 84            | 77            | 8                       |
| <i>Drosophila yakuba</i>     | Drosophila melanogaster sigma virus      | 203         | 81            | 75            | 14                      |
| <i>Aedes albopictus</i>      | Aedes flavivirus                         | 1716        | 89            | 74            | 17                      |
| <i>Aedes albopictus</i>      | Kamiti River virus                       | 420         | 81            | 74            | 16                      |
| <i>Anopheles stephensi</i>   | Hubei virga-like virus 21                | 87          | 90            | 74            | 18                      |
| <i>Drosophila willistoni</i> | Hubei diptera virus 17                   | 115         | 89            | 74            | 16                      |
| <i>Aedes albopictus</i>      | Australian Anopheles totivirus           | 323         | 83            | 73            | 14                      |
| <i>Spodoptera frugiperda</i> | Spodoptera frugiperda rhabdovirus        | 541         | 89            | 72            | 11                      |
| <i>Aedes aegypti</i>         | Australian Anopheles totivirus           | 372         | 82            | 71            | 13                      |
| <i>Spodoptera frugiperda</i> | Spodoptera frugiperda rhabdovirus        | 695         | 84            | 71            | 17                      |
| <i>Aedes aegypti</i>         | Australian Anopheles totivirus           | 616         | 81            | 70            | 14                      |
| <i>Aedes aegypti</i>         | Tongilchon virus 1                       | 131         | 84            | 70            | 11                      |
| <i>Ixodes ricinus</i>        | Deer tick mononegavirales-like virus     | 2454        | 77            | 70            | 17                      |
| <i>Spodoptera frugiperda</i> | Spodoptera frugiperda rhabdovirus*       | 1137        | 79            | 69            | 17                      |
| <i>Spodoptera frugiperda</i> | Spodoptera frugiperda rhabdovirus        | 841         | 79            | 69            | 11                      |

511 IHHNV = Infectious hypodermal and hematopoietic necrosis virus, SACDV = Sewage-  
 512 associated circular DNA virus.

513 \* The *S. frugiperda* genome assembly contains seven duplications of this EVE

514 **Table 3** Percent of EVEs with mapped 24-32 nt sRNAs displaying a significant ping-pong  
 515 signature

| Species                      | Location               | Total # EVEs | % of EVEs with significant ping-pong signature |
|------------------------------|------------------------|--------------|------------------------------------------------|
| <i>Aedes aegypti</i>         | Outside piRNA clusters | 156          | 13.46%                                         |
|                              | Inside piRNA clusters  | 117          | 11.97%                                         |
| <i>Aedes albopictus</i>      | Outside piRNA clusters | 499          | 7.21%                                          |
| <i>Anopheles gambiae</i>     | Outside piRNA clusters | 57           | 14.04%                                         |
| <i>Acyrtosiphon pisum</i>    | Outside piRNA clusters | 167          | 0.60%                                          |
|                              | Inside piRNA clusters  | 127          | 0.79%                                          |
| <i>Bactrocera dorsalis</i>   | Outside piRNA clusters | 9            | 11.11%                                         |
| <i>Blatella germanica</i>    | Outside piRNA clusters | 50           | 8.00%                                          |
|                              | Inside piRNA clusters  | 16           | 18.75%                                         |
| <i>Bombyx mori</i>           | Outside piRNA clusters | 28           | 17.86%                                         |
|                              | Inside piRNA clusters  | 26           | 11.54%                                         |
| <i>Diaphorina citri</i>      | Outside piRNA clusters | 86           | 3.49%                                          |
|                              | Inside piRNA clusters  | 18           | 5.56%                                          |
| <i>Drosophila mojavensis</i> | Inside piRNA clusters  | 2            | 50.00%                                         |
| <i>Drosophila virilis</i>    | Inside piRNA clusters  | 3            | 33.33%                                         |
| <i>Helicoverpa armigera</i>  | Outside piRNA clusters | 17           | 5.88%                                          |
| <i>Herpegnathos saltator</i> | Outside piRNA clusters | 131          | 7.63%                                          |
| <i>Musca domestica</i>       | Outside piRNA clusters | 3            | 33.33%                                         |
|                              | Inside piRNA clusters  | 4            | 50.00%                                         |
| <i>Myzus persicae</i>        | Outside piRNA clusters | 44           | 2.27%                                          |
| <i>Oncopeltus fasciatus</i>  | Outside piRNA clusters | 51           | 5.88%                                          |
| <i>Panaeus monodon</i>       | Outside piRNA clusters | 248          | 0.81%                                          |
| <i>Plutella xylostella</i>   | Inside piRNA clusters  | 70           | 4.29%                                          |
| <i>Spodoptera frugiperda</i> | Inside piRNA clusters  | 24           | 4.17%                                          |
| <i>Triops cancriformis</i>   | Outside piRNA clusters | 55           | 12.73%                                         |
|                              | Inside piRNA clusters  | 7            | 14.29%                                         |
| <i>Tribolium castaneum</i>   | Inside piRNA clusters  | 30           | 10%                                            |

516

517

518

519

520

521

522 **FIGURES**

523 **Figure 1**

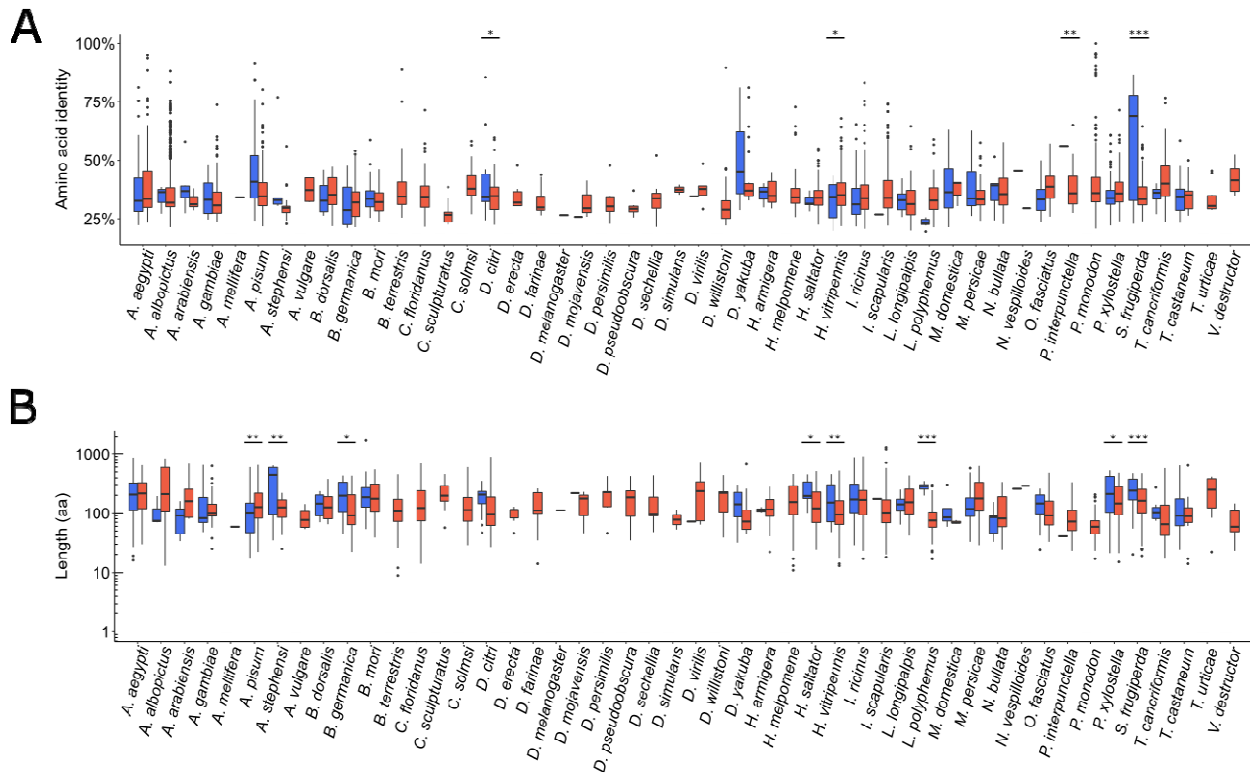

524

525

526 **Fig. 1.** (A) Distribution of amino acid identities between translated EVEs and their closest viral

527 BLASTx hit for the respective arthropod species listed. (B) Distribution of translated EVE

528 lengths in amino acids for the respective arthropod species listed. Blue = EVEs in piRNA

529 clusters, red = EVEs outside piRNA clusters. \* =  $p < .05$ , \*\* =  $p < .01$ , \*\*\* =  $p < .001$ ; unpaired

530 T-test

531

532

533

534

535

536 **Figure 2**

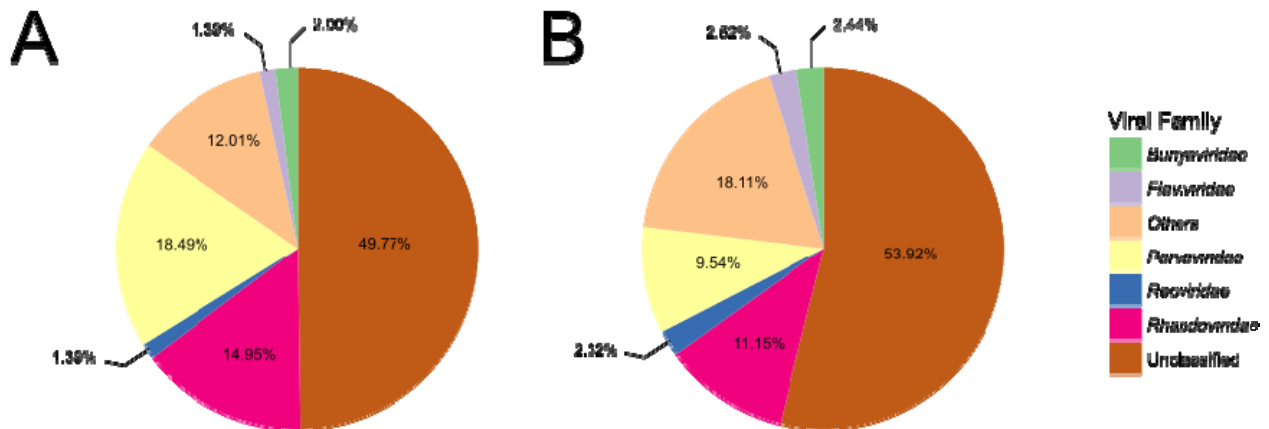

537

538

539 **Fig 2.** The most common viral families corresponding to EVEs found in arthropod genomes

540 within piRNA clusters (A) or outside piRNA clusters (B). Complete lists of viral families

541 corresponding to EVEs found within arthropod genomes are available in the supplementary

542 information (Additional files 5-6).

543

544

545

546

547

548

549

550

551

552

553

554 **Figure 3**

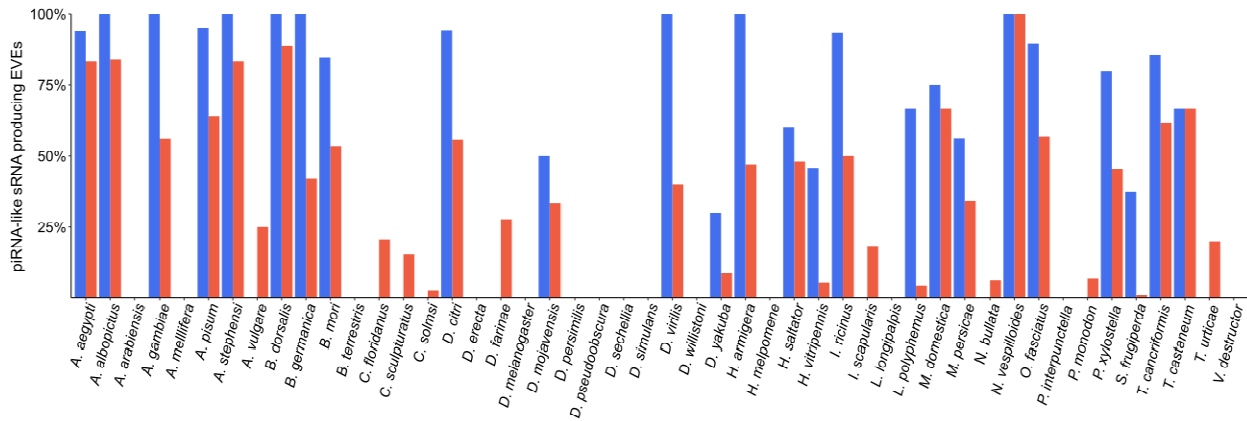

555

556

557 **Fig. 3** Percent of EVEs producing primary piRNAs for each arthropod species. Blue = EVEs in

558 piRNA clusters, red = EVEs outside piRNA clusters. Primary piRNA production from an EVE

559 was defined as a significant ( $p < .001$ , cumulative binomial distribution) 1U bias for 24-32

560 sRNAs mapping to the EVE.
